# Supplementary material for: Does families-schools cooperation improve school-aged children's social emotional behaviour (SEB) and academic achievement? Systematic Review
Source: Research Square preprint supplement (doi:10.21203/rs.3.rs-6808774/v1), 2025-07-22
Supplement: Supplementary file 1 [file 1c8ee2b0f7670051e341dfda.docx]

Appendix A: *Classification of Interventions by Ecological Level and SEL Competency Domains*

| Intervention | Ecological Level | Number of Studies | Highest Rating | Outcomes Targeted |
| --- | --- | --- | --- | --- |
| Family Check-Up (FCU) | Microsystem | 3 | 2* | Self-regulation, externalizing behavior |
| Strong Start | Microsystem | 1 | 1* | Internalizing/externalizing behavior |
| Conjoint Behavioral Consultation (CBC) | Microsystem | 10 | 1* | Compliance, classroom behavior |
| Self-directed Triple P | Microsystem | 1 | 1* | SEB (via SDQ) |
| School-Home Notes (SHN) | Microsystem | 3 | 0* | On-task behavior, SEB |
| Direct Behavior Rating | Microsystem | 1 | 0* | Classroom problem behavior |
| Coping Cat | Microsystem | 1 | 0* | Anxiety, math performance |
| 4-week Positive Beginnings | Microsystem | 1 | 0* | Challenging behavior |
| Families and Schools Together (FAST) | Mesosystem | 12 | 3* | SEB and academic achievement |
| Family-School Partnership (FSP) | Mesosystem | 3 | 1* | Aggression, shy behavior |
| DC Family Engagement Partnership (FEP) | Mesosystem | 1 | 2* | Attendance, discipline, academic performance |
| Parent–Teacher Bidirectional Communication | Mesosystem | 1 | 0* | Homework completion |
| Practical Parenting Partnerships (PPP) | Mesosystem | 1 | 1* | GPA, academic success |
| Families as Learners, Teachers, and Partners (FALTAP) | Mesosystem | 1 | 0* | Reading, math |
| Computer Program (Taylor, 1996) | Mesosystem | 1 | 1* | Math and reading achievement |
| Chicago Parent Program (CPP) | Macrosystem | 1 | 1* | Emotion regulation, aggression |
| Parent Teacher Home Visits (PTHV) | Macrosystem | 1 | 0* | SEB and academic outcomes |
| Incredible Years | Macrosystem | 1 | 0* | SEB |
| PARTNERS Program | Macrosystem | 1 | 0* | Early SEB outcomes |
| Iowa Strengthening Families Program (ISFP) | Macrosystem | 1 | 2* | Hostile/aggressive behavior |
| 4 Workshops (Chamorro, 2019) | Macrosystem | 1 | 0* | Reading comprehension |
| UNODC Global Family Skills (McDonald, 2013) | Macrosystem | 1 | 0* | Behavior problems |

Appendix B: *Interventions for Improving Social-emotional Behavior of Young People and Their Effects*

| Name of intervention | Studies | Rating | Age of children | Outcome | Effects |
| --- | --- | --- | --- | --- | --- |
| Families and Schools Together (FAST)  N = 12 | Gamoran et al. (2021) | 3* | 6 – 7 | Internalizing behavior  Externalizing behavior | Positive |
| Kratochwil et al. (2004) | 1* | 5 – 9 | Externalizing behavior, social problems, thought problems, attention, delinquent behavior, aggressive behavior  Internalizing behavior, withdrawn, sleep problems, anxiety/ depression | Mixed  Immediate outcome showed positive effect on externalizing behavior and no effect on internalizing behavior, but this is different from Turley’s study; long-term outcomes showed positive effect on all behavior.  Parents and teachers’ report of these behavior were different. |
| Lord et al. (2018) | 1* | 4 – 7 | Behavior  Prosocial behavior | Mixed  Year 1 showed both positive and negative; By the end of Year 2, these effects had waned. |
| McDonald et al. (2006) | 1* | 8 – 9 | Anxiety  Aggression  Social skills | Positive |
| Moberg et al. (2007) | 1* | 6 – 9 | Externalizing behavior  (aggressive behaviors)  Internalizing behavior (withdrawn, anxiety/ depressive behaviors and complaints) | Mixed  To Latino children, teachers reported less externalizing (aggressive) & higher social skills than children in FAME, but parents rated higher levels of externalizing  To African American children, internalizing behavior were higher in the FAST group |
| Fearnow-Kenney et al. (2016) | 0 | 6 – 11 | Social relationship  Self-control | Positive |
| Fischer, R. L. (2003) | 0 | 4 – 12 | Child behavior problems | Positive |
| Knox et al. (2011) | 0 | 9.5  Average | Aggression | No effect |
| McDonald et al. (2013) | 0 | 7 | Conduct problems  Hyperactivity  Peer problems  Problem behaviors | Positive |
| Sass, J. S. (1999) | 0 | 7.6  average | Child behavior problems | Positive |
| Warren et al. (2006) | 0 | 6 - 10 | Aggressive and delinquent behaviors | Positive |
| Crozier et al. (2010) | 0 | 7.7  average | Prosocial behavior  Difficulties  (emotional issues, conduct problems, peer relationships, hyperactivity) | Positive  No effect |
| Chicago Parent Program (CPP) | Bettencourt et al. (2023) | 1* | 5 - 8 | Aggression  Emotion regulation  Follow directions  Kindergarten readiness,  Chronic absence  Grade retention  Suspensions/expulsions | Positive  (interview)  No effect |
| Conjoint Behavioral Consultation (CBC) | Sheridan et al. (2012) | 1* | 5 - 9 | Behavioral competence  Problem behaviors  Social skills | Positive (from teachers & parents) |
| N = 10 | Sheridan et al. (2017) | 1* | 5 - 9 | Aggressiveness, noncompliance, temper tantrums  Adaptive Skills  Social skills  Internalizing and externalizing behaviors | Positive  No significant effect |
|  | Clarke et al. (2017) | 1* | 5 - 9 | Externalizing behavior  Internalizing behavior  Social skills | Positive |
|  | Sheridan et al. (2013) | 0 | 5 - 9 | Arguing  Defiance  Noncompliance  Tantrums | Positive |
|  | Schumacher et al. (2021) | 1* | 5 - 9 | Problem behavior  Adaptive behavior  Social skills | Positive |
|  | Davis, E. S. (2022) | 0 | 8 - 12 | On-task behavior  Maladaptive behavior | Positive |
|  | Ohmstede et al. (2015) | 0 | 9 - 13 | Externalizing behavior | Positive |
|  | Ramirez, A. (2019) | 0 | Primary school | Problem behavior | No effect |
|  | Sheridan et al. (2006) | 0 | 3 - 6 | Behavior | Positive |
|  | Witte et al. (2023) | 0 | 6 - 7 | Off-task behavior at school  Problem behavior at home | Positive |
| Family Check-Up (FCU) | Fosco et al. (2013) | 2* | 11 - 13 | Problem behavior | Positive |
|  | Stormshak et al. (2010) | 1* | 11 - 13 | Depression  School engagement in  high school | Positive |
|  | Garbacz et al. (2022) | 1* | 9 - 10 | Emotional problems  Behavioral problems | Positive |
| Iowa Strengthening Families Program (ISFP) | Spoth et al (2000) | 1* | 11 - 12 | Aggressive  Hostile behaviors | Positive |
| Incredible Years Parenting Program &  PARTNERS program | Webster-Stratton et al. (2001) | 1* | 4 | Conduct problems  Noncompliance  Aggression | Positive |
| (they are same) | Webster-Stratton, C. (1998) | 1* | 4.7  average | Conduct problems  Noncompliance | Positive |
| The family-school partnership (FSP) | Ialongo el al. (1999) | 1* | 5 - 8 | Problems behavior  Aggression  Shy behavior | Positive    Mixed  Positive on boys and no effect on girls.  No effect |
|  | Ialongo el al. (2001) | 1* | 11 - 12 | Conduct problems  School suspension  Mental health | Positive  Mixed  A significant intervention effect was found for girls.  No effect |
|  | Parker, J. (2020 | 0 | 5 – 6  9 - 19 | Problem behavior | Positive |
| Self-directed Triple P | Cina et al. (2011) | 1* | 8.7  average | Conduct problems  Emotional problems  Peer-related problems  Hyperactivity | Positive |
| Direct Behavior Rating (DBR) | LeBel, T. J. (2009) | 0 | 3 – 4 | Classroom problems behavior | Positive |
| The Fit and Strong | Cina et al. (2011) | 1* | 8.7  average | Problem behavior | No effect |
| The Coping Cat | Brown, K. L. (2014) | 0 | 8 - 9 | Anxiety | Positive |
| The 4-week Positive Beginnings program | Kalymon, K. M. (2008) | 0 | 2 - 4 | Challenging behavior | Positive |
| School-Home Notes | Kelley et al. (1995) | 0 | 6 - 9 | On-task behavior | Positive |
|  | Pritchard, N. F. (2012) | 0 | 14 - 15 | On-task behavior  Academic productivity behavior | Mixed  Positive for three of four students |
|  | Williams, K. L. (2006) | 0 | 6 - 11 | Classroom behavior | Positive |
| Strong Start  program | Taylor, H. L. (2010) | 1* | 5 - 6 | Externalizing and internalizing behavior problems externalizing and internalizing behavior problems  Problem solving and social skills | Positive |
| Parent–Teacher Bidirectional Communication | Bennett-Conroy, W. (2012) | 0 | 13 – 14 | Submission of homework assignments | Positive |

*Appendix C: Interventions for Improving Academic Performance of Young People and Their Effects*

| Name of intervention | Studies | Rating | Age of children | Outcome | Effects |
| --- | --- | --- | --- | --- | --- |
| Families and Schools Together (FAST) | Gamoran et al. (2021) | 3* | 6 - 7 | Reading  Math | No effect |
| Kratochwil et al. (2004) | 2* | 4 - 7 | Academic competence | Mixed |
| McDonald et al. (2006) | 1* | 8 - 9 | Academic performance  Academic competence | Positive |
| Moberg et al. (2007) | 1* | 6 - 9 | Academic performance | Positive |
| Fearnow-Kenney et al. (2016) | 0 | 6 - 11 | Academic performance | Positive |
| Practical Parenting Partnerships (PPP) | Bice, C. J. F. (2002) | 1* | 10 - 11 | GPA  Math | Mixed Positive on males |
| The Coping Cat | Brown, K. L. (2014) | 0 | 8 - 9 | Math | Positive |
| 4 Workshops | Chamorro, K. M. (2019) | 0 | 9 - 10 | Reading | positive |
| Families as Learners, Teachers,  and Parents project (FALTAP) | Baker, C. E. (1995) | 0* | 7 - 8  10 - 11 | Reading  Math | Positive |
| The computer program | Taylor, F. E. (1996) | 1* | 5 - 12 | Reading  Math  Achievement score | Positive |
